# Supplementary material for: Engineered yeast Yarrowia lipolytica as a chassis for biosynthesis of fatty acids from mannitol and macroalgal biomass extracts
Source: Springer Nature journal article supplement (doi:10.1186/s12934-025-02699-9), 2025-03-26
Supplement: MOESM1 [file 12934_2025_2699_MOESM1_ESM.pdf]

## Supplementary Data

### Engineered yeast *Yarrowia lipolytica* as a chassis for biosynthesis of fatty acids from mannitol and macroalgal biomass extracts

Mateusz Szczepańczyk<sup>1</sup>, Dorota A. Rzechonek<sup>1,2</sup>, Adam Dobrowolski<sup>1</sup>, Aleksandra M. Mirończuk<sup>1\*</sup>

<sup>1</sup> Wrocław University of Environmental and Life Sciences, Institute of Environmental Biology, Laboratory for Biosustainability, 5b Kozuchowska St., 51-631, Wrocław, Poland

<sup>2</sup>Department of Life Sciences (LIFE), Chalmers University of Technology, Kemivägen 10. SE-412 96 Göteborg, Sweden

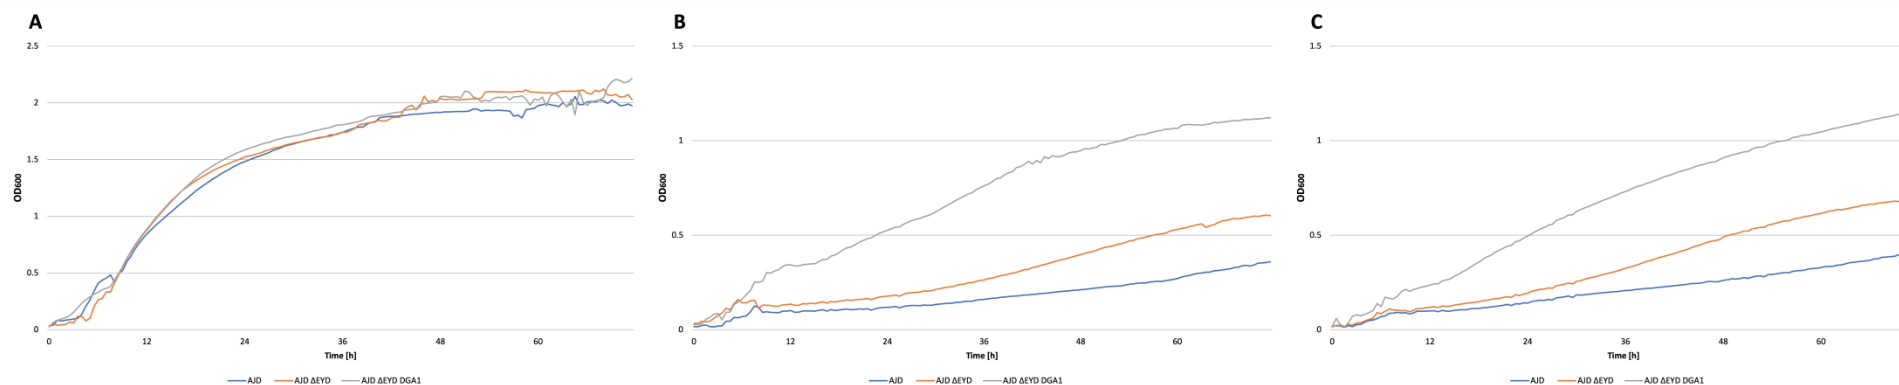

Figure 1. Growth curves for parental strain AJD (blue), strain with the knockout of *EYD1* gene (orange) and the knockout strain with additional overexpression of *DGA1* gene (gray) in rich YPD medium (A) on minimal medium with 2% mannitol (B) and minimal medium supplemented with 10% mannitol (C).
